# Supplementary material for: Wolbachia in Aedes koreicus: Rare Detections and Possible Implications
Source: MDPI journal article supplement (doi:10.3390/insects13020216), 2022-02-21
Supplement: s1 [file s1]

# SUPPLEMENTARY MATERIALS

**Table S1. Mosquito, collected in field in 2019 and 2020, included in the study**

| Year collection | Province  | Village                       | Latitude   | Longitude  | N°♂/N°♀       |
|-----------------|-----------|-------------------------------|------------|------------|---------------|
| 2019            | Belluno   | Belluno                       | 46,140833  | 12,21555   | 20♂/19♀       |
|                 | Vicenza   | Maragnole Breganze            | 45,68552   | 11,605205  | 1♀            |
|                 | Vicenza   | Cogollo del Cengio            | 45,788363  | 11,420538  | 1♀            |
|                 | Vicenza   | Schio                         | 45,711351  | 11,355359  | 1♀            |
|                 | Vicenza   | Zanè                          | 45,723679  | 11,440547  | 2♀            |
|                 | Vicenza   | Sarcedo                       | 45,695491  | 11,531565  | 1♀            |
|                 | Vicenza   | Calvene                       | 45,765396  | 11,512042  | 1♀            |
|                 | Udine     | Premariacco                   | 46,059641  | 13,387753  | 2♂            |
|                 | Vicenza   | Vicenza                       | 45,557696  | 11,517407  | 1♀            |
|                 | Padova    | Padova                        | 45,407717  | 11,873446  | 1♀            |
|                 | Vicenza   | Gallio                        | 45,892927  | 11,546982  | 1♀            |
|                 | Gorizia   | Cormons                       | 45,97019   | 13,46404   | 1♀            |
|                 | Gorizia   | Dolegna del Collio            | 46,042337  | 13,48574   | 1♀            |
|                 | Padova    | Baone                         | 45,276222  | 11,697777  | 1♀            |
|                 | Trieste   | Duino-Aurisina                | 45,75631   | 13,65875   | 1♀            |
|                 | Padova    | Arcugnano                     | 45,498066  | 11,550607  | 1♀            |
|                 | Pordenone | San Giorgio della Rinchivelda | 46,025438  | 12,821231  | 1♀            |
| 2020            | Belluno   | Feltre                        | 46,017516  | 11,917255  | 3♀            |
|                 | Padova    | Baone                         | 45,2549837 | 11,6862818 | 4♂/4♀         |
|                 | Vicenza   | Valli del Pasubio             | 45,763089  | 11,225205  | 5♂/1♀         |
|                 | Vicenza   | Carrè                         | 45,746616  | 11,472657  | 2♂/3♀         |
|                 | Vicenza   | Laghi                         | 45,825713  | 11,268992  | 4♂/5♀         |
|                 | Vicenza   | Lastebasse                    | 45,915663  | 11,271447  | 5♀            |
|                 | Verona    | Monteforte d'Alpone           | 45,4449577 | 11,2852704 | 2♂            |
|                 | Belluno   | Belluno                       | 46,12666   | 12,2334    | 4♂/4♀         |
|                 | Belluno   | Pedavena                      | 46,051107  | 11,872342  | 5♂/5♀         |
|                 | Pordenone | Montereale Valcellina         | 46,16652   | 12,660769  | 1♀            |
|                 | Pordenone | Maniago                       | 46,160859  | 12,679668  | 2♀            |
|                 | Pordenone | Arba                          | 46,143553  | 12,785998  | 4♂            |
|                 | Pordenone | Fontanafredda                 | 45,960318  | 12,54969   | 4♀            |
|                 | Belluno   | Sospirolo                     | 46,142985  | 12,074161  | 5♂/3♀         |
|                 | Padova    | Cinto Euganeo                 | 45,289394  | 11,702084  | 1♀            |
|                 | Belluno   | Limana                        | 46,097651  | 12,179237  | 5♀            |
|                 | Verona    | San Zeno di Montagna          | 45,6442    | 10,7406    | 1♀            |
|                 | Verona    | Torri del Benaco              | 45,6079    | 10,7039    | 2♂            |
|                 | Verona    | Soave                         | 45,4304848 | 11,2398901 | 1♂            |
|                 | Treviso   | Godega di Sant'Urbano         | 45,921427  | 12,418442  | 2♀            |
|                 | Vicenza   | Nanto                         | 45,4294    | 11,5849    | 2♂            |
|                 | Treviso   | Domegge di Cadore             | 46,461897  | 12,419128  | 2♀            |
| Total           |           |                               |            |            | 148 (63♂/85♀) |

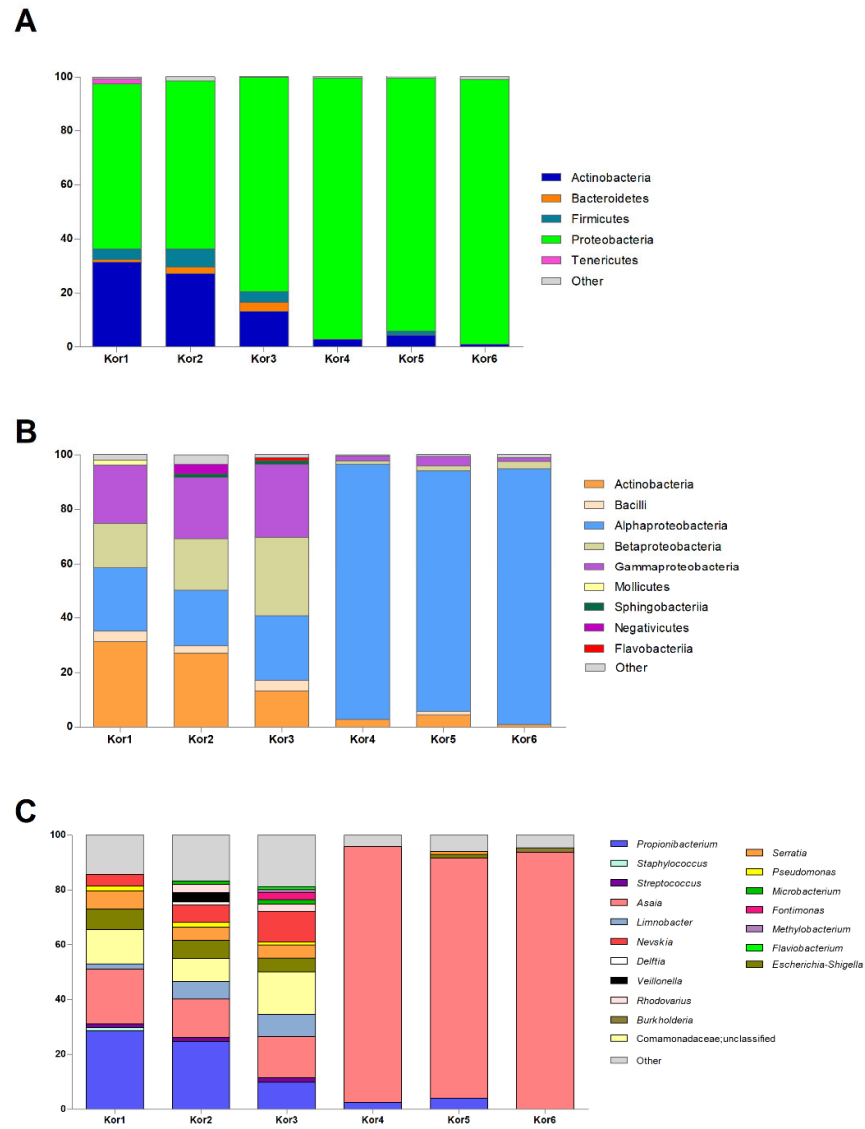

**Figure S1.** (A) Phylum level composition (B) Class level composition and (C) Genus composition (% of OTUs) in female *Ae. koreicus* mosquitoes. Only OTUs representing > 1% of the total reads are represented.
